# Supplementary material for: Se-doping-induced sulfur vacancy engineering of CuCo2S4 nanosheets for enhanced electrocatalytic overall water splitting
Source: Royal Society of Chemistry journal article supplement (doi:10.1039/d3nr03609j), 2023-01-01
Supplement: d3nr03609j1.pdf [file d3nr03609j1.pdf]

## Supporting information

### Se-doped-induced sulfur vacancy engineering of $\text{CuCo}_2\text{S}_4$ nanosheets for enhanced electrocatalytic overall water splitting

Bianli Zhang, Xingyue Qian, Hui Xu, Lin Jiang, Jiawei Xia, Haiqun Chen\* and  
Guangyu He\*

Key Laboratory of Advanced Catalytic Materials and Technology, Advanced Catalysis  
and Green Manufacturing Collaborative Innovation Center, Changzhou University,  
Changzhou, Jiangsu 213164, China

\* Corresponding authors.

E-mail addresses: hegy@cczu.edu.cn (G. He), 0000-0001-5100-0324

chenhq@cczu.edu.cn (H. Chen), 0000-0001-7805-6395

## 1. Experimental section

### 1.1 Characterizations

X-ray diffraction (XRD) patterns were carried out on an X-ray diffractometer with  
 $\text{Cu K}\alpha$  radiation ( $\lambda = 1.54178 \text{ \AA}$ ). Raman spectra (Japan LabRAMHR evolution) of  
samples were collected on a Renishaw in Via-Reflex Raman microprobe. Electron  
paramagnetic resonance (EPR) spectra were acquired from a Bruker EMXPLUS A30.  
The morphologies of samples were analyzed by scanning electron microscopy (SEM,  
ZEISS, Germany) and transmission electron microscopy (TEM, JEOL Ltd., JEM-  
2100F) operated at 200 kV. X-ray photoelectron spectroscopy (XPS) was employed to

obtain chemical valence of prepared catalysts on an XPS instrument (ESCALAB 250, Thermo, USA). The binding energy (BE) was measured by confirming the C-C peak at 284.8 eV. The BET surface area and pore size distributions were characterized by N<sub>2</sub> adsorption/desorption isotherms performed on Micromeritics ASAP2010C equipment in static measurement mode at -196 °C. All samples were degassed at 120 °C for 24 h before measurements. The specific surface area was studied based on the Brunauer-Emmett-Teller (BET) model. The inductively coupled plasma optical emission spectrometer (ICP-OES, 720ES, Agilent, US) was used to detect the contents of catalyst.

## **1.2 Electrochemical measurements**

All electrochemical measurements were conducted at room temperature using CHI 760E electrochemical workstation with a standard three-electrode system. Hg/HgO and graphite rod were used as reference and counter electrodes in alkaline solution, respectively. For working electrode, 4.0 mg sample and 20 μL Nafion (5 wt%) was dissolved into 480 μL solution containing 360 μL absolute ethanol and 120 μL DI water. The obtained slurry was ultrasonicated for 1 h to acquire a uniform suspension. Then, 50 μL above dispersion was dropped onto a carbon paper (1 x 1 cm<sup>2</sup>) and dried at room temperature. The linear sweep voltammetry (LSV) curves were collected at a scan rate of 5 mV s<sup>-1</sup> in 1 M KOH electrolyte. All polarization curves were corrected with 95% iR compensation with respect to the ohmic resistance of the solution. Electrochemical impedance spectra (EIS) were assessed at open-circuit potential with the frequency

range of  $10^6$  to  $10^{-1}$  Hz. Long-term chronoamperometric tests were conducted at the corresponding potential.

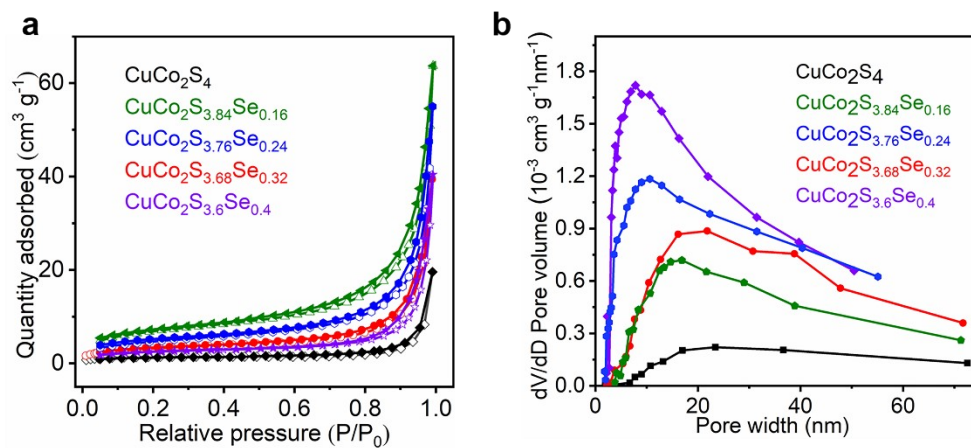

**Fig. S1**  $\text{N}_2$  adsorption/desorption isotherms of  $\text{CuCo}_2\text{S}_4$  and  $\text{CuCo}_2\text{S}_{4-x}\text{Se}_x$ .

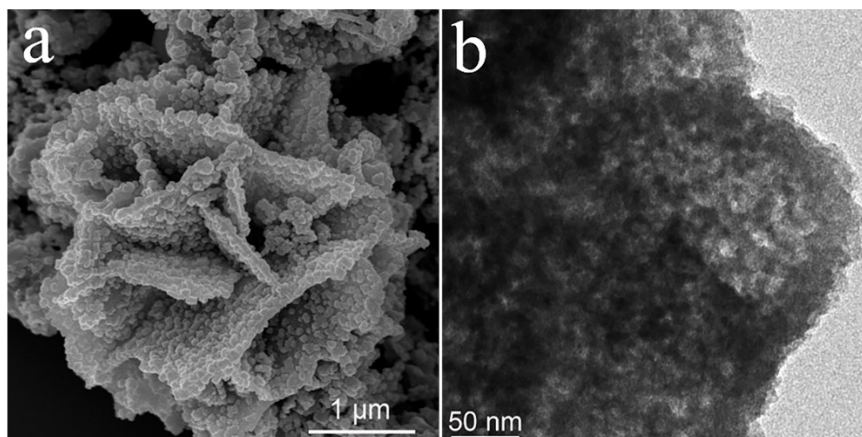

**Fig. S2** (a) SEM and (b) TEM images of  $\text{CuCo}_2\text{S}_{3.68}\text{Se}_{0.32}$  after OER test.

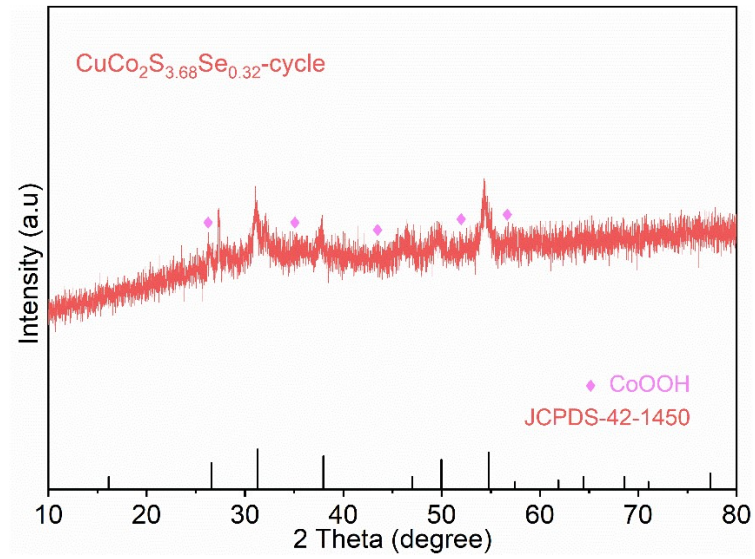

**Fig. S3** XRD pattern of  $\text{CuCo}_2\text{S}_{3.68}\text{Se}_{0.32}$  after a 24 h *i-t* test for OER.

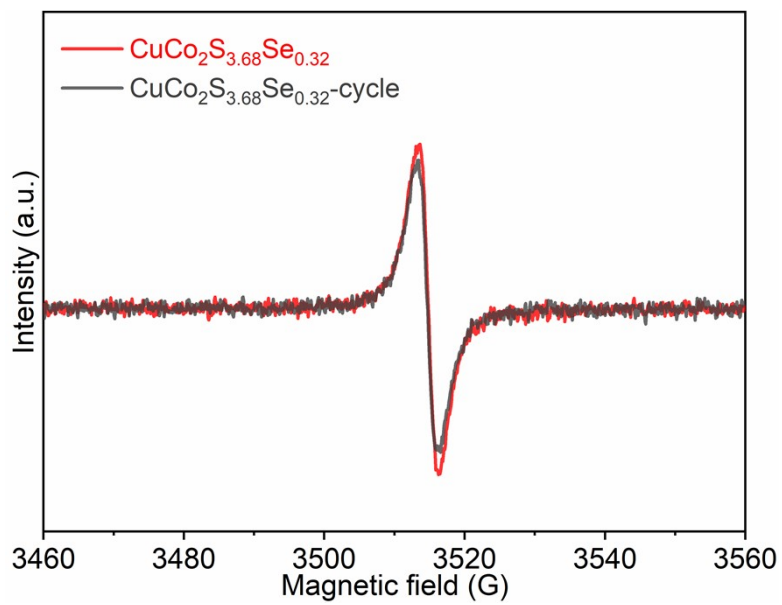

**Fig. S4** EPR spectra of  $\text{CuCo}_2\text{S}_{3.68}\text{Se}_{0.32}$  before and after OER test.

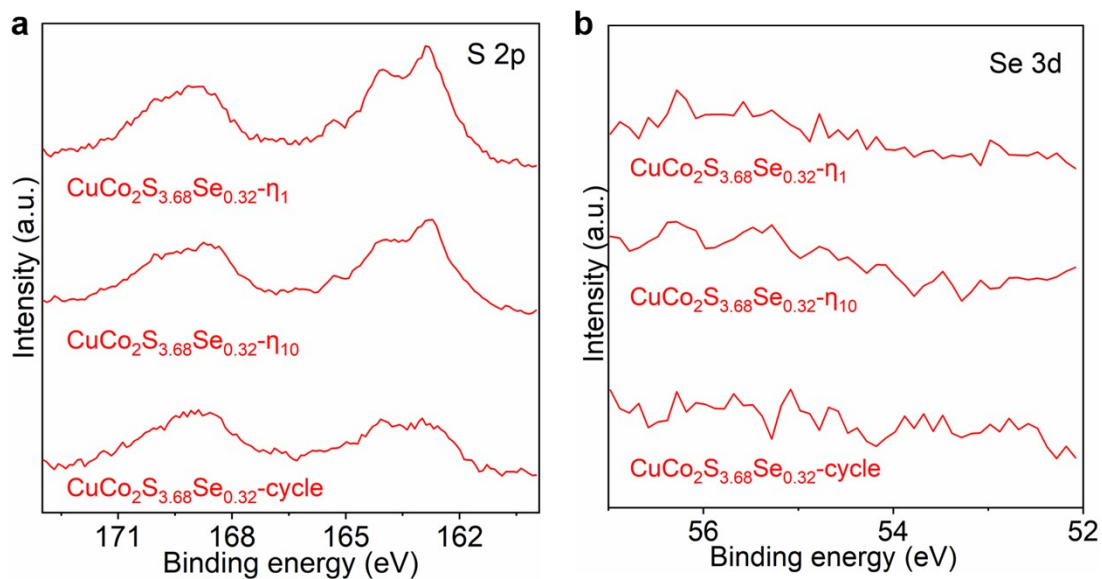

**Fig. S5** (a) S 2p, (b)Se 3d high resolution XPS spectral of  $\text{CuCo}_2\text{S}_{3.68}\text{Se}_{0.32}$  after different activation time for OER.

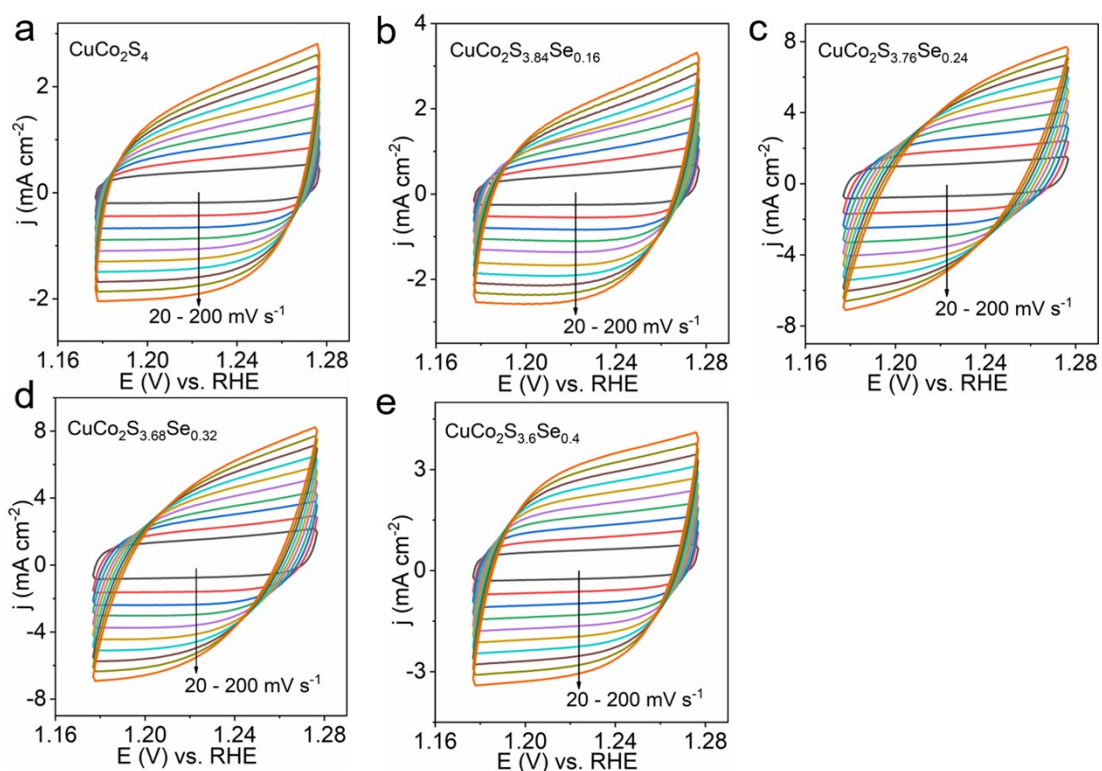

**Fig. S6** Typical cyclic voltammetry curves of  $\text{CuCo}_2\text{S}_{4-x}\text{Se}_x$  in 1M KOH for OER at the scan rates from 20 to 200 mV s<sup>-1</sup>.

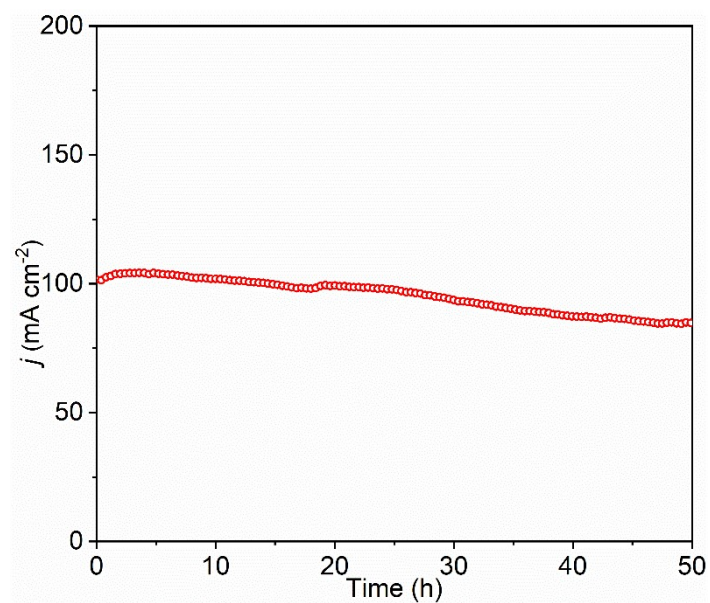

**Fig. S7** Chronoamperometric ( $i$ - $t$ ) curves of the  $\text{CuCo}_2\text{S}_{3.68}\text{Se}_{0.32}$  electrode at current densities of  $100 \text{ mA cm}^{-2}$  over 50 h.

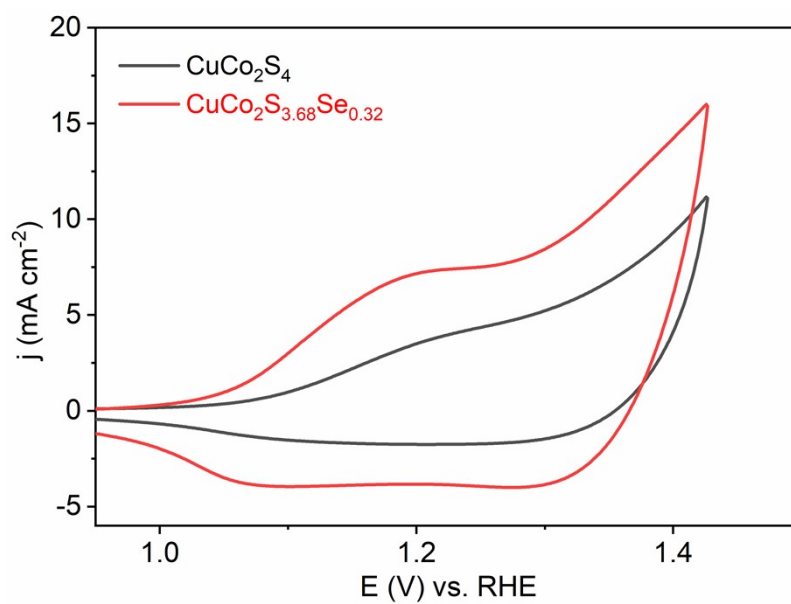

**Fig. S8** Cyclic voltammetry (CV) curves of  $\text{CuCo}_2\text{S}_{3.68}\text{Se}_{0.32}$  and  $\text{CuCo}_2\text{S}_4$ .

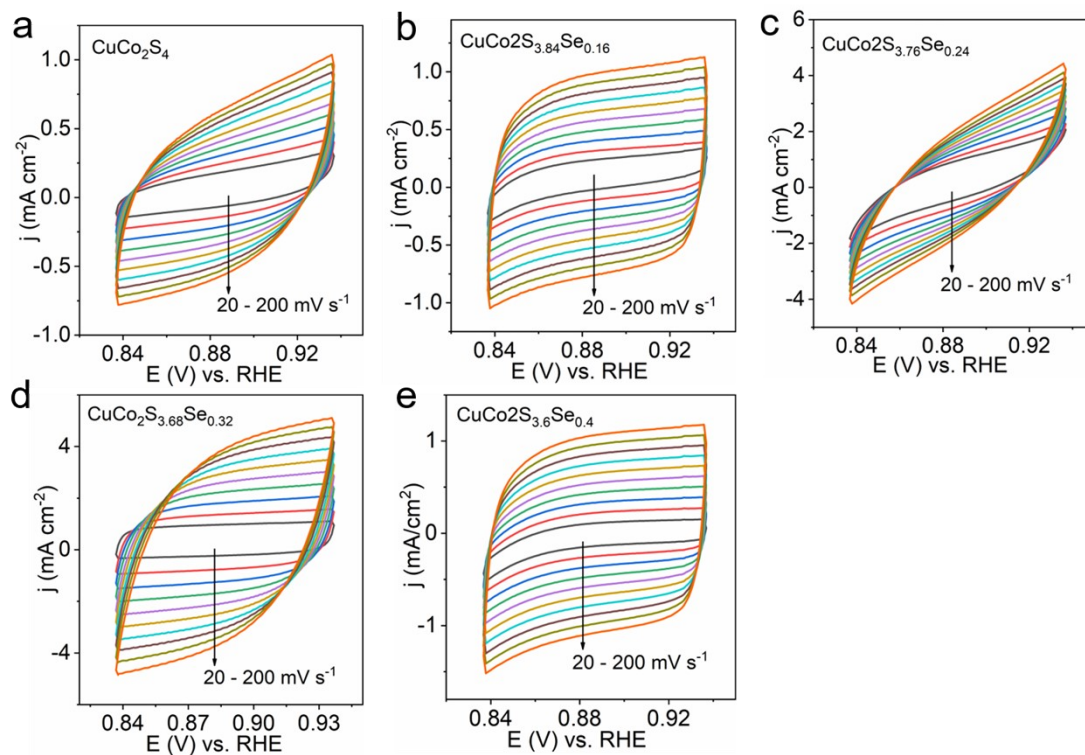

**Fig. S9** Typical cyclic voltammetry curves of  $\text{CuCo}_2\text{S}_{4-x}\text{Se}_x$  in 1M KOH for HER at the scan rates from 20 to 200  $\text{mV s}^{-1}$ .

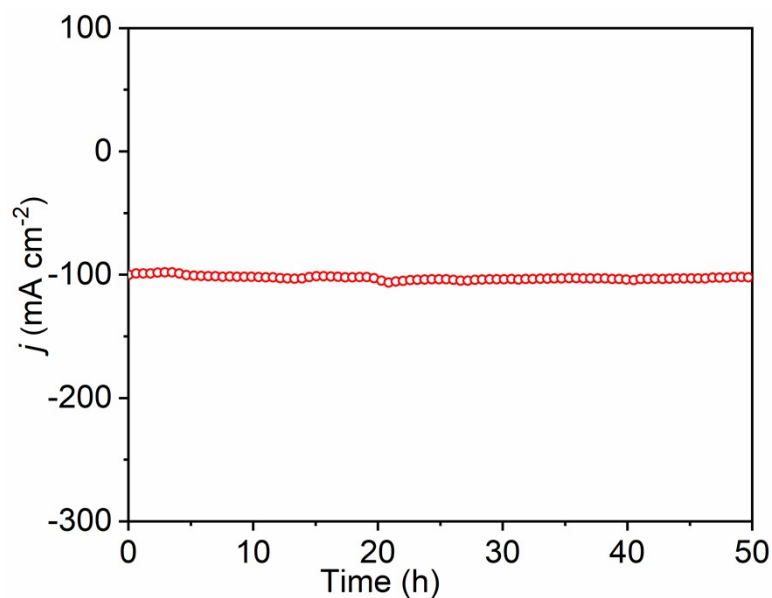

**Fig. S10** Chronoamperometric ( $i-t$ ) curves of the  $\text{CuCo}_2\text{S}_{3.68}\text{Se}_{0.32}$  electrode at current densities of  $-100 \text{ mA cm}^{-2}$  over 50 h.

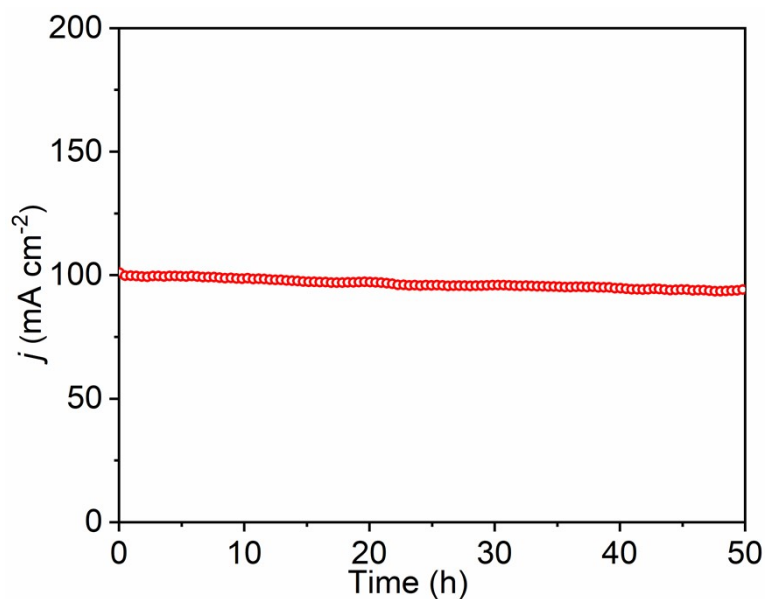

**Fig. S11** Chronoamperometric ( $i$ - $t$ ) curves of the  $\text{CuCo}_2\text{S}_{3.68}\text{Se}_{0.32}$  electrode at current densities of  $100 \text{ mA cm}^{-2}$  over 50 h for overall water-splitting.

**Table S1.** BET parameters of the as-prepared  $\text{CuCo}_2\text{S}_4$  and  $\text{CuCo}_2\text{S}_{3.68}\text{Se}_{0.32}$  samples.

| Sample                                         | BET specific surface area ( $\text{m}^2 \text{ g}^{-1}$ ) |
|------------------------------------------------|-----------------------------------------------------------|
| $\text{CuCo}_2\text{S}_4$                      | 4.56                                                      |
| $\text{CuCo}_2\text{S}_{3.84}\text{Se}_{0.16}$ | 7.68                                                      |
| $\text{CuCo}_2\text{S}_{3.76}\text{Se}_{0.24}$ | 9.06                                                      |
| $\text{CuCo}_2\text{S}_{3.68}\text{Se}_{0.32}$ | 11.25                                                     |
| $\text{CuCo}_2\text{S}_{3.6}\text{Se}_{0.4}$   | 10.13                                                     |



**Table S2.** The weight percentage content of elements in  $\text{CuCo}_2\text{S}_{4-x}\text{Se}_x$  from ICP and elemental analysis data.

| Sample                                         | S (wt %) | Se (wt %) |
|------------------------------------------------|----------|-----------|
| $\text{CuCo}_2\text{S}_{3.84}\text{Se}_{0.16}$ | 32.15    | 3.12      |
| $\text{CuCo}_2\text{S}_{3.76}\text{Se}_{0.24}$ | 30.14    | 4.85      |
| $\text{CuCo}_2\text{S}_{3.68}\text{Se}_{0.32}$ | 29.80    | 6.09      |
| $\text{CuCo}_2\text{S}_{3.6}\text{Se}_{0.4}$   | 28.83    | 7.66      |

**Table S3.** Peak area ratios and Co atomic ratios of different samples in the XPS spectra.

| Sample                                         | $\text{Co}^{2+}$ | $\text{Co}^{3+}$ | $\text{Co}^{2+}/\text{Co}^{3+}$ |
|------------------------------------------------|------------------|------------------|---------------------------------|
| $\text{CuCo}_2\text{S}_4$                      | 0.49             | 0.51             | 0.96                            |
| $\text{CuCo}_2\text{S}_{3.84}\text{Se}_{0.16}$ | 0.51             | 0.49             | 1.04                            |
| $\text{CuCo}_2\text{S}_{3.76}\text{Se}_{0.24}$ | 0.52             | 0.48             | 1.08                            |
| $\text{CuCo}_2\text{S}_{3.68}\text{Se}_{0.32}$ | 0.62             | 0.38             | 1.63                            |
| $\text{CuCo}_2\text{S}_{3.6}\text{Se}_{0.4}$   | 0.51             | 0.49             | 1.04                            |

**Table S4.** Peak area ratios and Cu atomic ratios of different samples in the XPS spectra.

| Sample                                                 | Cu <sup>+</sup> | Cu <sup>2+</sup> | Cu <sup>+</sup> / Cu <sup>2+</sup> |
|--------------------------------------------------------|-----------------|------------------|------------------------------------|
| CuCo <sub>2</sub> S <sub>4</sub>                       | 0.75            | 0.25             | 3.00                               |
| CuCo <sub>2</sub> S <sub>3.84</sub> Se <sub>0.16</sub> | 0.76            | 0.24             | 3.17                               |
| CuCo <sub>2</sub> S <sub>3.76</sub> Se <sub>0.24</sub> | 0.78            | 0.22             | 3.54                               |
| CuCo <sub>2</sub> S <sub>3.68</sub> Se <sub>0.32</sub> | 0.84            | 0.16             | 5.25                               |
| CuCo <sub>2</sub> S <sub>3.6</sub> Se <sub>0.4</sub>   | 0.79            | 0.21             | 3.76                               |

**Table S5.** Peak area ratios and S atomic ratios of different samples in the XPS spectra.

| Sample                                                 | S 2p <sub>1/2</sub> | S 2p <sub>3/2</sub> | 2p <sub>1/2</sub> /2p <sub>3/2</sub> |
|--------------------------------------------------------|---------------------|---------------------|--------------------------------------|
| CuCo <sub>2</sub> S <sub>4</sub>                       | 0.21                | 0.48                | 0.44                                 |
| CuCo <sub>2</sub> S <sub>3.84</sub> Se <sub>0.16</sub> | 0.23                | 0.49                | 0.47                                 |
| CuCo <sub>2</sub> S <sub>3.76</sub> Se <sub>0.24</sub> | 0.25                | 0.36                | 0.69                                 |
| CuCo <sub>2</sub> S <sub>3.68</sub> Se <sub>0.32</sub> | 0.44                | 0.29                | 1.52                                 |
| CuCo <sub>2</sub> S <sub>3.6</sub> Se <sub>0.4</sub>   | 0.40                | 0.33                | 1.21                                 |

**Table S6.** Peak area ratios and Co atomic ratios of different activation time in the XPS spectra.

| Sample                                                                 | Co <sup>2+</sup> | Co <sup>3+</sup> | Co <sup>3+</sup> / Co <sup>2+</sup> |
|------------------------------------------------------------------------|------------------|------------------|-------------------------------------|
| CuCo <sub>2</sub> S <sub>3.68</sub> Se <sub>0.32</sub>                 | 0.62             | 0.38             | 0.59                                |
| CuCo <sub>2</sub> S <sub>3.68</sub> Se <sub>0.32-η</sub> <sub>1</sub>  | 0.53             | 0.47             | 0.89                                |
| CuCo <sub>2</sub> S <sub>3.68</sub> Se <sub>0.32-η</sub> <sub>10</sub> | 0.48             | 0.52             | 1.08                                |
| CuCo <sub>2</sub> S <sub>3.6</sub> Se <sub>0.4-cycle</sub>             | 0.41             | 0.59             | 1.44                                |

**Table S7.** Peak area ratios and Cu atomic ratios of different activation time in the XPS spectra.

| Sample                                                                 | Cu <sup>2+</sup> | Cu <sup>+</sup> | Cu <sup>2+</sup> / Cu <sup>+</sup> |
|------------------------------------------------------------------------|------------------|-----------------|------------------------------------|
| CuCo <sub>2</sub> S <sub>3.68</sub> Se <sub>0.32</sub>                 | 0.16             | 0.84            | 1.63                               |
| CuCo <sub>2</sub> S <sub>3.68</sub> Se <sub>0.32-η</sub> <sub>1</sub>  | 0.54             | 0.46            | 0.89                               |
| CuCo <sub>2</sub> S <sub>3.68</sub> Se <sub>0.32-η</sub> <sub>10</sub> | 0.60             | 0.40            | 1.08                               |
| CuCo <sub>2</sub> S <sub>3.6</sub> Se <sub>0.4-cycle</sub>             | 0.64             | 0.36            | 1.78                               |

**Table S8.** Comparison of OER performance for reported electrocatalysts.

| Catalyst                                                                 | Mass loading<br>(mg cm <sup>-2</sup> ) | OER<br>$\eta_{10}$ (mV) | Tafel slope<br>(mV dec <sup>-1</sup> ) | Ref.      |
|--------------------------------------------------------------------------|----------------------------------------|-------------------------|----------------------------------------|-----------|
| CuCo <sub>2</sub> S <sub>3.68</sub> Se <sub>0.32</sub>                   | 0.4                                    | 230                     | 58                                     | This work |
| Ru-Co/ELCO                                                               | 1.0                                    | 295                     | 58.8                                   | [1]       |
| LiCoO <sub>1.8</sub> Cl <sub>0.2</sub>                                   | 0.4                                    | 270                     | 55.4                                   | [2]       |
| Zn <sub>0.2</sub> Co <sub>0.8</sub> OOH                                  | 0.2                                    | 235                     | 35.7                                   | [3]       |
| CoSe <sub>2</sub> -D <sub>Fe</sub> -V <sub>Co</sub>                      | 0.12                                   | 310                     | 53.5                                   | [4]       |
| NiMoO <sub>4</sub>                                                       | 0.26                                   | 351                     | 69                                     | [5]       |
| LiCo <sub>0.8</sub> Fe <sub>0.2</sub> O <sub>2</sub>                     | 0.23                                   | 340                     | 50                                     | [6]       |
| KxCoFe <sub>0.12</sub> O <sub>2</sub>                                    | 1.0                                    | 290                     | 50                                     | [7]       |
| La <sub>0.7</sub> Sr <sub>0.3</sub> CoO <sub>3-<math>\delta</math></sub> | 0.35                                   | 326                     | 70.8                                   | [8]       |
| Fe <sub>2</sub> Co-GNCL                                                  | 0.26                                   | 350                     | 70                                     | [9]       |
| CoFe-MOF                                                                 | 0.21                                   | 265                     | 44.0                                   | [10]      |
| CoFe 2D MOFs                                                             | 0.35                                   | 274                     | 46.7                                   | [11]      |

**Table S9.** Comparison of HER performance for reported electrocatalysts.

| Catalyst                                                                  | Mass loading<br>(mg cm <sup>-2</sup> ) | OER<br>$\eta_{10}$ (mV) | Tafel slope<br>(mV dec <sup>-1</sup> ) | Ref.      |
|---------------------------------------------------------------------------|----------------------------------------|-------------------------|----------------------------------------|-----------|
| CuCo <sub>2</sub> S <sub>3.68</sub> Se <sub>0.32</sub>                    | 0.4                                    | 65                      | 64                                     | This work |
| Co/Co <sub>3</sub> O <sub>4</sub>                                         | 0.85                                   | ~90                     | 44                                     | [12]      |
| Co@C/NC                                                                   | 0.4                                    | 174.5                   | 95.1                                   | [13]      |
| Co-Fe-P                                                                   | 0.29                                   | 86                      | 66                                     | [14]      |
| CS@CNC NAs/CC                                                             | 2.2                                    | 84                      | 38                                     | [15]      |
| Cu-Co-P <sub>20</sub>                                                     | 0.9                                    | 138                     | 48                                     | [16]      |
| NCF-MOF                                                                   | 0.5                                    | 270                     | 114                                    | [17]      |
| Co <sub>50</sub> -Mo <sub>2</sub> C-12                                    | 0.2                                    | 125                     | 70.95                                  | [18]      |
| CN/CNL/MoS <sub>2</sub> /CP                                               | 0.2                                    | 106                     | 117                                    | [19]      |
| CoP@N,S-3D-GN                                                             | 0.2                                    | 118                     | 50                                     | [20]      |
| Ni <sub>0.67</sub> Co <sub>0.33</sub> /Ni <sub>3</sub> S <sub>2</sub> @NF | 2.0                                    | 87                      | 80                                     | [21]      |

**Table S10.** Comparison of overall water splitting (OWS) performance with other bifunctional electrocatalysts.

| Catalyst                                               | Mass loading<br>(mg cm <sup>-2</sup> ) | OWS P <sub>10</sub><br>(V) | Ref.      |
|--------------------------------------------------------|----------------------------------------|----------------------------|-----------|
| CuCo <sub>2</sub> S <sub>3.68</sub> Se <sub>0.32</sub> | 0.4                                    | 1.52                       | This work |
| ZnCoS-NSCNT/NP                                         | 1.0                                    | 1.59                       | [22]      |
| Co <sub>2</sub> P/CoP@Co@NCNT                          | 4.3                                    | 1.60                       | [23]      |
| Co-NC@Ni <sub>2</sub> Fe-LDH                           | 1.8                                    | 1.55                       | [24]      |
| Co/Mo <sub>2</sub> C@C                                 | 0.34                                   | 1.59                       | [25]      |
| NCS/NS-rGO                                             | 0.2                                    | 1.58                       | [26]      |
| CMC/750SA                                              | 0.36                                   | 1.589                      | [27]      |
| 10:MoCo-VS <sub>2</sub>                                | 2.0                                    | 1.54                       | [28]      |
| Co-CoO/Ti <sub>3</sub> C <sub>2</sub> -MXene           | 2.0                                    | 1.55                       | [29]      |

\*P<sub>10</sub>: The required a cell voltage to drive a current density of 10 mA·cm<sup>-2</sup>.

## References

- [1] X. Zheng, J. Yang, Z. Xu, Q. Wang, J. Wu, E. Zhang, S. Dou, W. Sun, D. Wang and Y. Li, *Angew. Chem., Int. Ed.*, 2022, **61**, e202205946.
- [2] J. Wang, S. J. Kim, J. Liu, Y. Gao, S. Choi, J. Han, H. Shin, S. Jo, J. Kim, F. Ciucci, H. Kim, Q. Li, W. Yang, X. Long, S. Yang, S. P. Cho, K. H. Chae, M. G. Kim, H. Kim and J. Lim, *Nat. Catal.*, 2021, **4**, 212-222.
- [3] Z.F. Huang, J. Song, Y. Du, S. Xi, S. Dou, J.M.V. Nsanzimana, C. Wang, Z.J. Xu and X. Wang, *Nat. Energy*, 2019, **4**, 329-338.
- [4] Y. Dou, C. T. He, L. Zhang, H. Yin, M. Al-Mamun, J. Ma and H. Zhao, *Nat. Commun.*, 2020, **11**, 1664.
- [5] C. Ye, J. Liu, Q. Zhang, X. Jin, Y. Zhao, Z. Pan, G. Chen, Y. Qiu, D. Ye, L. Gu, G. I. N. Waterhouse, L. Guo and S. Yang, *J. Am. Chem. Soc.*, 2021, **143**, 14169-14177.
- [6] Y. Zhu, W. Zhou, Y. Chen, J. Yu, M. Liu and Z. Shao, *Adv. Mater.*, 2015, **27**, 7150-7155.
- [7] Y. K. Sonia, M. K. Paliwal and S. K. Meher, *Sustain. Energy Fuels*, 2021, **5**, 973-985.
- [8] Y. Lu, A. Ma, Y. Yu, R. Tan, C. Liu, P. Zhang, D. Liu and J. Gui, *ACS Sustainable Chem. Eng.*, 2019, **7**, 2906-2910.
- [9] Y. S. Wei, L. Sun, M. Wang, J. Hong, L. Zou, H. Liu, Y. Wang, M. Zhang, Z. Liu, Y. Li, S. Horike, K. Suenaga and Q. Xu, *Angew. Chem., Int. Ed.*, 2020, **59**, 16013-16022.

- [10] Z. Zou, T. Wang, X. Zhao, W.-J. Jiang, H. Pan, D. Gao and C. Xu, *ACS Catal.* 2019, **9**, 7356-7364.
- [11] M. Cai, Q. Liu, Z. Xue, Y. Li, Y. Fan, A. Huang, M. R. Li, M. Croft, T. A. Tyson, Z. Ke and G. Li, *J. Mater. Chem. A*, 2020, **8**, 190-195.
- [12] X. Yan, L. Tian, M. He and X. Chen, *Nano Lett.*, 2015, **15**, 6015-6021.
- [13] Q. Wang, K. Cui, D. Liu, Y. Wu and S. Ren, *Energy Fuels*, 2022, **36**, 1688-1696.
- [14] J. Chen, J. Liu, J. Q. Xie, H. Ye, X. Z. Fu, R. Sun and C. P. Wong, *Nano Energy*, 2019, **56**, 225-233.
- [15] F. Tian, S. Geng, L. He, Y. Huang, A. Fauzi, W. Yang, Y. Liu and Y. Yu, *Chem. Eng. J.*, 2021, **417**, 129232.
- [16] Y. Y. S. Park, W. S. Choi, M. J. Jang, J. H. Lee, S. Park, H. Jin, M. H. Seo, K. H. Lee, Y. Yin, Y. Kim, J. Yang and S. M. Choi, *ACS Sustainable Chem. Eng.*, 2019, **7**, 10734-10741.
- [17] W. Ahn, M. G. Park, D. U. Lee, M. H. Seo, G. Jiang, Z. P. Cano, F. M. Hassan and Z. Chen, *Adv. Funct. Mater.*, 2018, **28**, 1802129.
- [18] Y. Ma, M. Chen, H. Geng, H. Dong, P. Wu, X. Li, G. Guan and T. Wang, *Adv. Funct. Mater.*, 2020, **30**, 2000561.
- [19] J. Dong, X. Zhang, J. Huang, J. Hu, Z. Chen and Y. Lai, *Chem. Eng. J.*, 2021, **412**, 128556.
- [20] C. Karaman, O. Karaman, N. Atar and M. L. Yola, *Electrochimica Acta*, 2021, **380**, 138262.



- [21] Z. Wu, Y. Feng, Z. Qin, X. Han, X. Zheng, Y. Deng and W. Hu, *Small*, 2022, **18**, 2106904.
- [22] Z. Yu, Y. Bai, S. Zhang, Y. Liu, N. Zhang and K. Sun, *J. Mater. Chem. A*, 2018, **6**, 10441-10446.
- [23] D. Fa, Y. Tao, X. Pan, D. Wang, G. Feng, J. Yuan, Q. Luo, Y. Song, X. J. Gao, L. Yang, S. Lei and W. Hu, *Angew Chem. Int. Ed.*, 2022, **61**, e202207845.
- [24] T. Guo, L. Chen, Y. Li and K. Shen, *Small*, 2022, **18**, 2107739.
- [25] S. Yuan, M. Xia, Z. Liu, K. Wang, L. Xiang, G. Huang, J. Zhang and N. Li, *Chem. Eng. J.*, 2022, **430**, 132697.
- [26] H. Li, L. Chen, P. Jin, Y. Li, J. Pang, J. Hou, S. Peng, G. Wang and Y. Shi, *Nano Res.*, 2022, **15**, 950-958.
- [27] W. Yaseen, M. Xie, B. A. Yusuf, Y. Xu, N. Ullah, M. Rafiq, A. Ali and J. Xie, *Appl. Surf. Sci.*, 2022, **579**, 152148.
- [27] V. K. Singh, U. T. Nakate, P. Bhuyan, J. Chen, D. T. Tran and S. Park, *J. Mater. Chem. A*, 2022, **10**, 9067-9079.
- [29] D. Guo, X. Li, Y. Jiao, H. Yan, A. Wu, G. Yang, Y. Wang, C. Tian and H. Fu, *Nano Res.*, 2022, **15**, 238-247.
